# Supplementary material for: Sex-Specific Differences in the Gut Microbiome in Response to Dietary Fiber Supplementation in IL-10-Deficient Mice
Source: PubMed Central journal article supplement (PMC7400915; doi:10.3390/nu12072088), 2020-07-15
Supplement: nutrients-12-02088-s001.pdf [file nutrients-12-02088-s001.pdf]

## SUPPLEMENTAL MATERIALS

### A Male

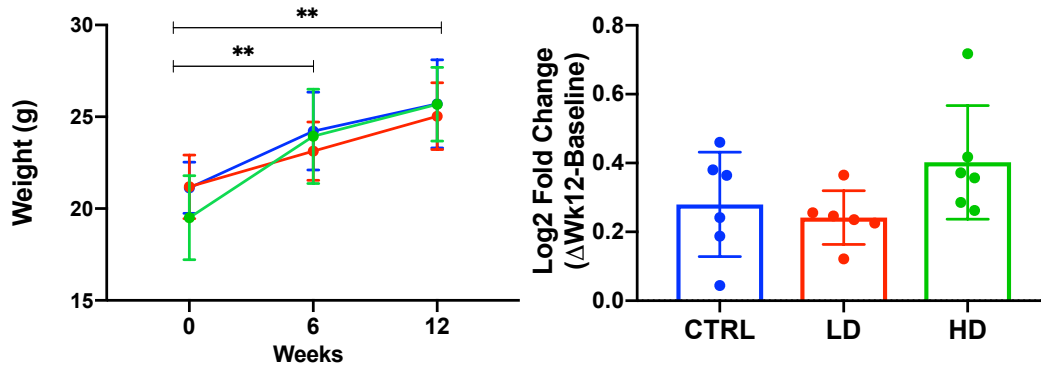

### B Female

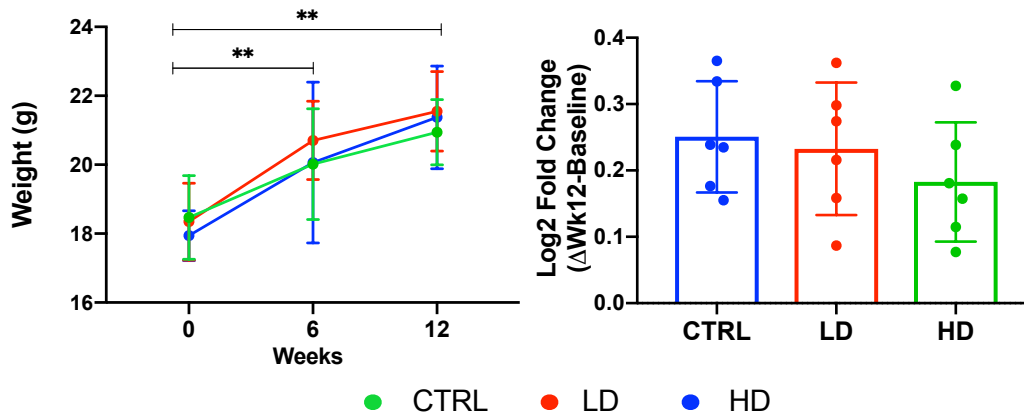

**Figure S1. Weight gain of IL-10<sup>-/-</sup> mice over 12 weeks isomaltodextrin (IMD) intervention.** The changes in weight over 12 weeks, and comparison of shifts in weight (log<sub>2</sub> transformed fold-change: Week12/Baseline) between treatment groups in (A) male mice, and (B) female mice, respectively. Repeated measures two-way ANOVA with Tukey post-hoc test was used to assess differences between times or between treatments. Comparison of shifts in weight ( $\Delta$  Week 12 – Baseline) between treatments groups was used Kruskal-Wallis with Dunn's test. \*\*  $p < 0.01$ , \*  $p < 0.05$ . Data were reported as mean  $\pm$  SD.

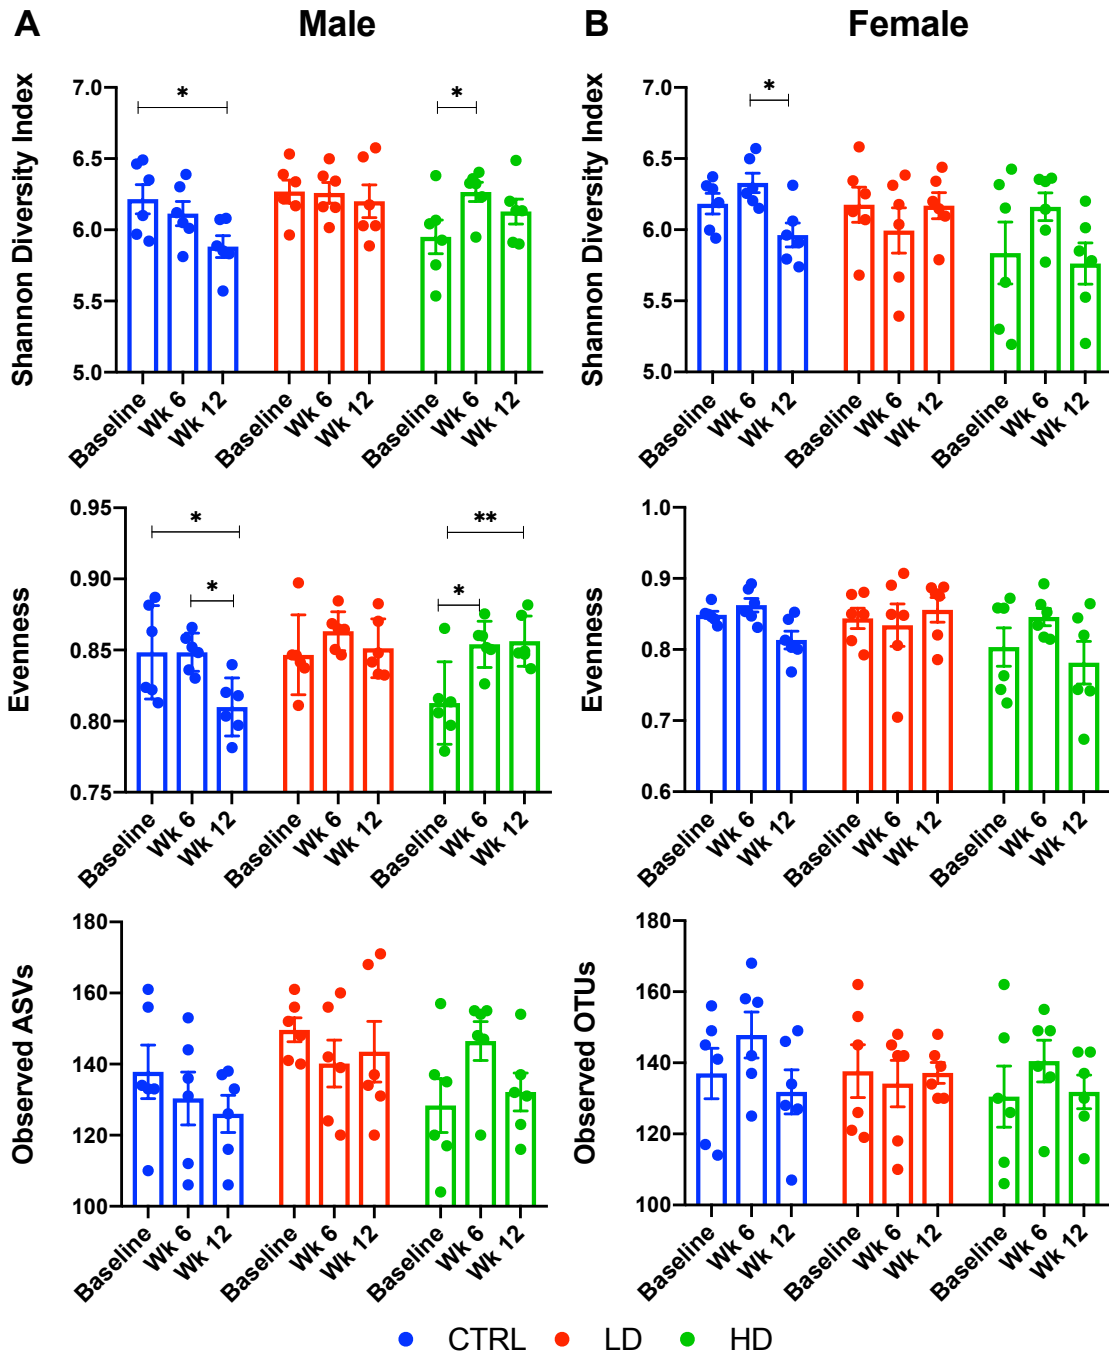

**Figure S2. Changes in fecal microbiota alpha-diversity of IL-10<sup>-/-</sup> mice over 12 weeks isomaltodextrin (IMD) intervention.** The changes in alpha-diversity index (Shannon, Evenness and Observed ASVs) over 12 weeks among the treatment groups in (A) male mice, and (B) female mice, respectively. Repeated measures two-way ANOVA with Tukey post-hoc test was used to assess differences between times or between treatments. \*\*  $p < 0.01$ , \*  $p < 0.05$ . Data were reported as mean  $\pm$  SD.

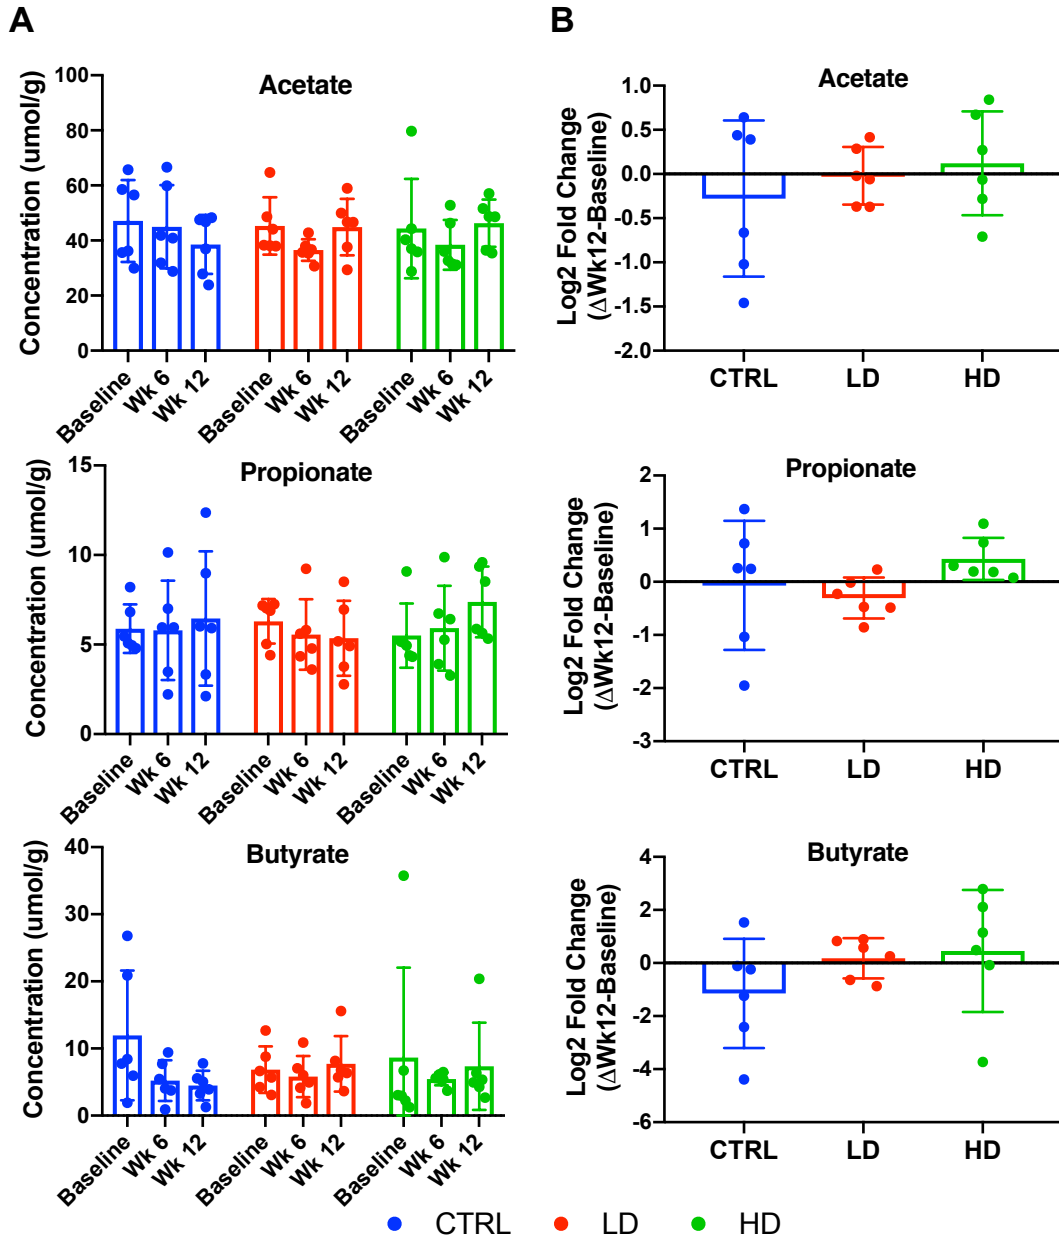

**Figure S3. Changes in fecal short chain fatty acids (SCFAs) concentration of IL-10<sup>-/-</sup> male mice over 12 weeks isomaltodextrin (IMD) intervention. (A)** Repeated measures two-way ANOVA with Tukey post-hoc test was used to assess differences between times or between treatments. **(B)** Comparison of shifts in SCFAs concentrations ( $\Delta$  Week 12 – Baseline) between treatments groups was conducted by ANCOVA with permutations (n=999), adjusted by the food consumption AUC. Post hoc test was performed by Tukey's procedure. Data were reported as mean  $\pm$  SD.

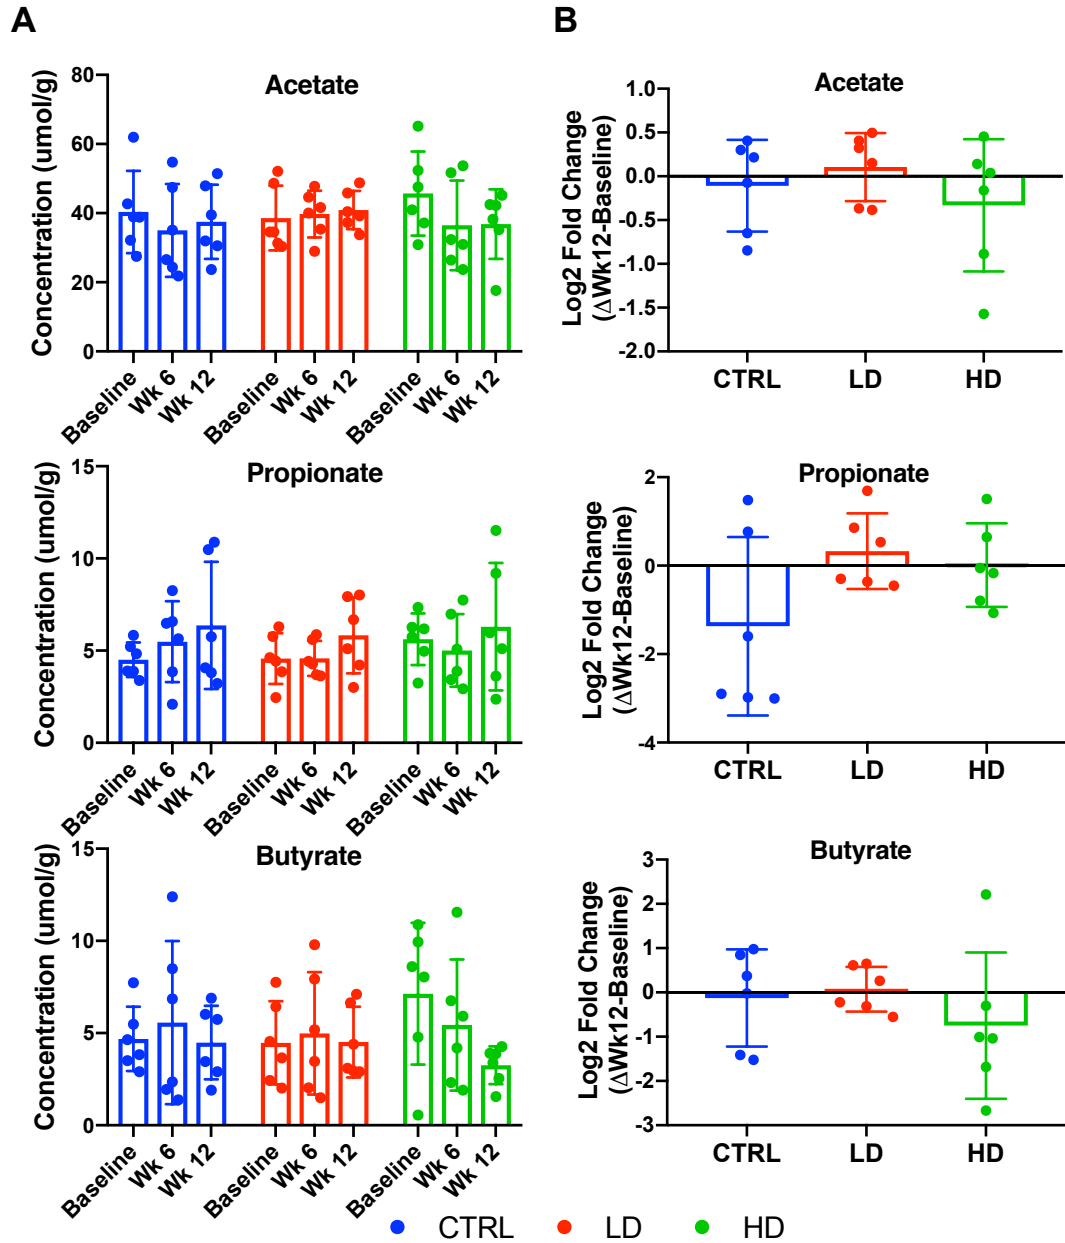

**Figure S4. Changes in fecal short chain fatty acids (SCFAs) concentration of IL-10<sup>-/-</sup> female mice over 12 weeks isomaltodextrin (IMD) intervention.** (A) Repeated measures two-way ANOVA with Tukey post-hoc test was used to assess differences between times or between treatments. (B) Comparison of shifts in SCFAs concentrations ( $\Delta$  Week 12 – Baseline) between treatments groups was used ANCOVA with permutations ( $n=999$ ), adjusted by the food consumption AUC, and with Tukey post-hoc test. \*\*  $p < 0.01$ , \*  $p < 0.05$ . Data were reported as mean  $\pm$  SD.

**Table S2. Fecal bacterial relative abundance changes in male IL-10<sup>-/-</sup> mice with isomaltodextrin (IMD) intervention**

| Taxa                | Control    |            |                |                              |      | Low Dose IMD |            |                |                              |      | High Dose IMD |            |                |                              |      | Between Group Shift <i>p</i> values | FDR          |
|---------------------|------------|------------|----------------|------------------------------|------|--------------|------------|----------------|------------------------------|------|---------------|------------|----------------|------------------------------|------|-------------------------------------|--------------|
|                     | Baseline   | Week 12    | Absolute Shift | Within Group <i>p</i> values | FDR  | Baseline     | Week 12    | Absolute Shift | Within Group <i>p</i> values | FDR  | Baseline      | Week 12    | Absolute Shift | Within Group <i>p</i> values | FDR  |                                     |              |
| <b>Phylum</b>       |            |            |                |                              |      |              |            |                |                              |      |               |            |                |                              |      |                                     |              |
| F/B Ratio           | 0.94±0.7   | 0.52±0.4   | -0.42±0.7      | 0.44                         | 0.56 | 0.91±0.5     | 1.27±1.4   | 0.36±1.8       | 1.00                         | 1.00 | 0.42±0.3      | 1.03±0.8   | 0.61±1         | 0.22                         | 0.58 | 0.03                                | <b>0.10*</b> |
| Bacteroidetes       | 55.52±19.6 | 64.3±16.7  | 8.79±24.1      | 1.00                         | 1.00 | 52.71±13.7   | 52.02±20.6 | -0.68±33       | 0.84                         | 1.00 | 71.05±12.8    | 52.34±14.6 | -18.7±23.7     | 0.22                         | 0.58 | 0.03                                | <b>0.10*</b> |
| Firmicutes          | 41.79±18.4 | 27.67±13.7 | -14.1±24.3     | 0.44                         | 0.56 | 42.32±12.9   | 42.84±23.6 | 0.52±32.6      | 1.00                         | 1.00 | 26.62±12.8    | 44.51±14.5 | 17.88±23.1     | 0.16                         | 0.58 | 0.04                                | <b>0.11*</b> |
| Verrucomicrobia     | 0±0        | 3.89±4.1   | 3.89±4.1       | 0.06                         | 0.28 | 2.12±5.2     | 2.51±6.1   | 0.38±0.9       | 0.37                         | 0.74 | 0.64±1.3      | 1.23±2.7   | 0.6±3.3        | 0.79                         | 1.00 | 0.15                                | 0.29         |
| Proteobacteria      | 0.96±0.2   | 3.3±2.9    | 2.34±2.8       | 0.06                         | 0.28 | 0.81±0.3     | 1.57±0.8   | 0.76±0.7       | 0.03                         | 0.25 | 0.84±0.5      | 1.3±1      | 0.46±1.4       | 0.44                         | 0.88 | 0.18                                | 0.29         |
| Tenericutes         | 1.47±2.3   | 0.64±0.6   | -0.82±1.7      | 0.36                         | 0.56 | 1.69±2.8     | 0.56±0.7   | -1.12±2.8      | 0.31                         | 0.74 | 0.33±0.7      | 0.18±0.3   | -0.15±0.9      | 1.00                         | 1.00 | 0.57                                | 0.76         |
| Cyanobacteria       | 0.03±0.1   | 0±0        | -0.03±0.1      | 1.00                         | 1.00 | 0±0          | 0±0        | 0±0            | NA                           | NA   | 0±0           | 0±0        | 0±0            | NA                           | NA   | NA                                  | NA           |
| Actinobacteria      | 0.07±0.1   | 0.16±0.1   | 0.09±0.1       | 0.10                         | 0.30 | 0.23±0.1     | 0.26±0.2   | 0.03±0.2       | 0.28                         | 0.74 | 0.27±0.2      | 0.25±0.2   | -0.02±0.4      | 0.84                         | 1.00 | 0.69                                | 0.79         |
| TM7                 | 0.18±0.2   | 0.05±0.1   | -0.13±0.2      | 0.28                         | 0.56 | 0.12±0.1     | 0.23±0.2   | 0.11±0.2       | 1.00                         | 1.00 | 0.24±0.2      | 0.18±0.2   | -0.06±0.3      | 0.22                         | 1.00 | 0.94                                | 0.94         |
| <b>Genus</b>        |            |            |                |                              |      |              |            |                |                              |      |               |            |                |                              |      |                                     |              |
| f S24-7             | 39±14.6    | 41.24±11.2 | 2.25±19.6      | 0.84                         | 0.89 | 37.29±13.4   | 34.43±17.6 | -2.86±28       | 1.00                         | 1.00 | 42.28±8.5     | 27.93±14.1 | -14.3±15.5     | 0.09                         | 0.61 | 0.24                                | 0.68         |
| f Lachnospiracea 1  | 21.1±6.8   | 11.99±7    | -9.1±12.2      | 0.22                         | 0.40 | 21.54±5.4    | 14.79±10.1 | -6.75±12       | 0.56                         | 0.79 | 13.55±4.9     | 20.85±5.9  | 7.3±9          | 1.00                         | 1.00 | 0.09                                | 0.54         |
| g [Prevotella]      | 4.8±3.9    | 6.52±5.5   | 1.72±6.5       | 1.00                         | 1.00 | 3.51±2       | 3.39±2.4   | -0.12±2.3      | 0.56                         | 0.79 | 9.26±5        | 7.43±3.2   | -1.83±7.1      | 0.31                         | 0.78 | 0.94                                | 0.96         |
| o Clostridiales 1   | 5.91±3.3   | 2.78±1.3   | -3.14±4.1      | 0.22                         | 0.40 | 6±2.5        | 7.86±4.8   | 1.86±4.9       | 0.56                         | 0.79 | 3.83±3.2      | 8.5±3      | 4.67±5         | 0.22                         | 0.70 | 0.09                                | 0.54         |
| g Prevotella        | 2.77±2.7   | 9.36±4.6   | 6.6±5.3        | 0.03                         | 0.27 | 2.45±1.2     | 6.28±4.8   | 3.83±5.1       | 0.56                         | 0.79 | 7.67±7        | 6.68±4.3   | -0.99±6.8      | 0.84                         | 0.95 | 0.09                                | 0.54         |
| f Rikenellaceae     | 5.42±2.5   | 2.6±1.2    | -2.82±3.1      | 0.16                         | 0.40 | 5.89±4.8     | 4.17±4.7   | -1.73±7.1      | 0.56                         | 0.79 | 7.73±4.6      | 3.43±2.8   | -4.3±4.4       | 0.09                         | 0.61 | 0.59                                | 0.76         |
| g Bacteroides       | 1.32±0.4   | 2.67±1.2   | 1.35±1         | 0.31                         | 0.46 | 1.22±1.1     | 2.82±2.4   | 1.6±2.9        | 0.16                         | 0.68 | 2.58±2        | 5.89±5     | 3.31±4.1       | 0.84                         | 0.95 | 0.31                                | 0.68         |
| g Oscillospira      | 3.05±1.9   | 2.29±0.9   | -0.76±2.3      | 0.44                         | 0.57 | 4.42±3.2     | 2.67±2     | -1.76±4.5      | 0.56                         | 0.79 | 1.81±0.9      | 2.63±1.6   | 0.82±2.2       | 0.56                         | 0.95 | 0.59                                | 0.76         |
| g Akkermansia       | 0±0        | 3.89±4.1   | 3.89±4.1       | 0.03                         | 0.27 | 2.12±5.2     | 2.51±6.1   | 0.38±0.9       | 0.31                         | 0.79 | 0.64±1.3      | 1.23±2.7   | 0.6±3.3        | 1.00                         | 1.00 | 0.13                                | 0.66         |
| f Lachnospiraceae 2 | 3.84±2.7   | 1.6±1.4    | -2.24±3        | 0.06                         | 0.31 | 2.1±1.5      | 5.52±6.7   | 3.42±7.5       | 0.31                         | 0.79 | 2.38±2.1      | 1.93±1.3   | -0.45±3        | 0.31                         | 0.78 | 0.48                                | 0.76         |
| g Lactobacillus     | 0.97±2     | 4.17±8.8   | 3.19±6.8       | 0.31                         | 0.46 | 1.6±2.3      | 6.67±6.8   | 5.07±6.7       | 0.09                         | 0.47 | 1.38±1        | 3.2±2.9    | 1.81±2.8       | 0.69                         | 0.95 | 0.24                                | 0.68         |
| o Clostridiales 2   | 3.11±2.5   | 0.83±0.5   | -2.28±2.6      | 0.31                         | 0.46 | 3.64±2.5     | 1.21±1.2   | -2.43±2.3      | 0.06                         | 0.36 | 1.36±1.2      | 1.81±2.1   | 0.45±2.7       | 1.00                         | 1.00 | 0.70                                | 0.79         |
| g AF12              | 2.14±1.1   | 1.09±0.8   | -1.05±1.1      | 0.16                         | 0.40 | 2.28±1.8     | 0.89±0.9   | -1.39±1.7      | 0.06                         | 0.36 | 1.4±2.3       | 0.45±0.8   | -0.95±2.5      | 0.16                         | 0.61 | 0.70                                | 0.79         |
| g [Ruminococcus]    | 1.2±0.9    | 2.73±3.7   | 1.53±3.7       | 0.84                         | 0.89 | 0.97±0.5     | 1.99±3     | 1.02±3.2       | 0.69                         | 0.89 | 0.72±0.4      | 3.53±4.6   | 2.82±4.6       | 0.69                         | 0.95 | 0.70                                | 0.79         |
| g Sutterella        | 0.22±0.2   | 1.39±1     | 1.17±1.1       | 0.16                         | 0.40 | 0.39±0.5     | 0.93±1.1   | 0.54±1.2       | 0.84                         | 1.00 | 0.23±0.3      | 0.5±0.6    | 0.27±0.8       | 0.44                         | 0.85 | 0.70                                | 0.79         |
| g Anaeroplasma      | 1.47±2.3   | 0.64±0.6   | -0.82±1.7      | 0.22                         | 0.40 | 1.69±2.8     | 0.56±0.7   | -1.12±2.8      | 0.22                         | 0.77 | 0.33±0.7      | 0.18±0.3   | -0.15±0.9      | 0.69                         | 0.95 | 0.59                                | 0.76         |
| g Dehalobacterium   | 0.55±0.2   | 0.46±0.2   | -0.09±0.3      | 0.31                         | 0.46 | 0.53±0.3     | 0.63±0.5   | 0.1±0.7        | 1.00                         | 1.00 | 0.29±0.2      | 0.89±0.4   | 0.6±0.4        | 0.09                         | 0.61 | 0.06                                | 0.54         |
| o YS2 unclass       | 0.03±0.1   | 0±0        | -0.03±0.1      | 0.22                         | 0.40 | 0±0          | 0±0        | 0±0            | 0.44                         | 0.79 | 0±0           | 0±0        | 0±0            | 0.16                         | 0.61 | 1.00                                | 1.00         |
| g Clostridium       | 0.74±1     | 0.1±0.2    | -0.64±0.9      | 0.22                         | 0.40 | 0.31±0.4     | 0.3±0.3    | -0.01±0.5      | 1.00                         | 1.00 | 0.4±1         | 0.26±0.4   | -0.14±1.2      | 0.69                         | 0.95 | 0.24                                | 0.68         |
| g Desulfovibrio     | 0.37±0.2   | 0.28±0.2   | -0.1±0.3       | 0.16                         | 0.40 | 0.12±0.1     | 0.29±0.3   | 0.16±0.4       | 0.84                         | 1.00 | 0.23±0.3      | 0.45±0.4   | 0.22±0.6       | 0.44                         | 0.85 | 0.24                                | 0.68         |
| f Ruminococcaceae 1 | 0.49±0.4   | 0.2±0.3    | -0.29±0.6      | 0.22                         | 0.40 | 0.48±0.4     | 0.35±0.4   | -0.13±0.7      | 0.44                         | 0.79 | 0.31±0.3      | 0.19±0.4   | -0.12±0.3      | 0.22                         | 0.70 | 0.82                                | 0.89         |
| g Bilophila         | 0.31±0.3   | 0.11±0.1   | -0.2±0.2       | 0.16                         | 0.40 | 0.29±0.3     | 0.25±0.3   | -0.04±0.6      | 1.00                         | 1.00 | 0.19±0.2      | 0.14±0.3   | -0.05±0.3      | 0.06                         | 0.61 | 0.94                                | 0.96         |

|                      |          |          |           |      |      |          |          |           |      |      |          |          |           |      |      |       |              |
|----------------------|----------|----------|-----------|------|------|----------|----------|-----------|------|------|----------|----------|-----------|------|------|-------|--------------|
| g Adlercreutzia      | 0.07±0.1 | 0.16±0.1 | 0.09±0.1  | 0.06 | 0.31 | 0.23±0.1 | 0.26±0.2 | 0.03±0.2  | 1.00 | 1.00 | 0.27±0.2 | 0.25±0.2 | -0.02±0.4 | 0.84 | 0.95 | 0.24  | 0.68         |
| g Parabacteroides    | 0±0      | 0.37±0.4 | 0.37±0.4  | 0.06 | 0.31 | 0.03±0.1 | 0.05±0.1 | 0.02±0.1  | 1.00 | 1.00 | 0±0      | 0.46±0.2 | 0.46±0.2  | 0.03 | 0.61 | 0.31  | 0.68         |
| g Anaerotruncus      | 0.16±0.2 | 0.27±0.3 | 0.11±0.4  | 1.00 | 1.00 | 0.08±0.1 | 0.25±0.4 | 0.17±0.5  | 0.56 | 0.79 | 0.14±0.2 | 0.16±0.2 | 0.01±0.4  | 0.69 | 0.95 | 0.48  | 0.76         |
| g Coprococcus        | 0.3±0.3  | 0±0      | -0.3±0.3  | 0.03 | 0.27 | 0.31±0.3 | 0.09±0.1 | -0.22±0.4 | 0.22 | 0.77 | 0.18±0.1 | 0.17±0.1 | 0±0.1     | 0.16 | 0.61 | 0.002 | <b>0.08*</b> |
| f F16                | 0.18±0.2 | 0.05±0.1 | -0.13±0.2 | 0.31 | 0.46 | 0.12±0.1 | 0.23±0.2 | 0.11±0.2  | 0.03 | 0.36 | 0.24±0.2 | 0.18±0.2 | -0.06±0.3 | 0.84 | 0.95 | 0.59  | 0.76         |
| f Enterobacteriaceae | 0±0      | 1.33±3.3 | 1.33±3.3  | 0.69 | 0.83 | 0±0      | 0.01±0   | 0.01±0    | 0.06 | 0.36 | 0±0      | 0.07±0.2 | 0.07±0.2  | 0.84 | 0.95 | 0.59  | 0.76         |
| g Ruminococcus       | 0.25±0.3 | 0.11±0.2 | -0.14±0.3 | 0.16 | 0.40 | 0.29±0.2 | 0.06±0.1 | -0.23±0.3 | 0.06 | 0.36 | 0.1±0.2  | 0.08±0.1 | -0.02±0.3 | 0.69 | 0.95 | 0.48  | 0.76         |
| o RF32 unclass       | 0.05±0.1 | 0.19±0.2 | 0.14±0.2  | 0.44 | 0.57 | 0±0      | 0.09±0.1 | 0.09±0.1  | 0.06 | 0.36 | 0.19±0.4 | 0.14±0.2 | -0.05±0.5 | 1.00 | 1.00 | 0.59  | 0.76         |
| g Turicibacter       | 0±0      | 0±0      | 0±0       | 0.84 | 0.89 | 0±0      | 0.14±0.3 | 0.14±0.3  | 0.44 | 0.79 | 0±0      | 0±0      | 0±0       | 0.16 | 0.61 | 0.39  | 0.76         |
| g Butyricicoccus     | 0.01±0   | 0.06±0.1 | 0.04±0.1  | 0.84 | 0.89 | 0.03±0.1 | 0.12±0.3 | 0.09±0.3  | 0.69 | 0.89 | 0.11±0.2 | 0.22±0.5 | 0.11±0.6  | 0.44 | 0.85 | 0.59  | 0.76         |
| f Ruminococcaceae 2  | 0.09±0.1 | 0.06±0.1 | -0.03±0.1 | 0.56 | 0.70 | 0.01±0   | 0.02±0   | 0.01±0    | 0.31 | 0.79 | 0.05±0.1 | 0.06±0.1 | 0.01±0.1  | 0.44 | 0.85 | 0.31  | 0.68         |
| g Allobaculum        | 0±0      | 0.03±0.1 | 0.03±0.1  | 0.44 | 0.57 | 0±0      | 0.18±0.4 | 0.18±0.4  | 0.44 | 0.79 | 0±0      | 0.01±0   | 0.01±0    | 0.84 | 0.95 | 0.31  | 0.68         |

While majority of ASVs were classified at the genus level, some could only be classified to family (f\_), order (o\_), or class (c\_) levels. Statistical significance of within-group shifts between times was determined by paired Wilcoxon test, while between-group differences in shift ( $\Delta$  Week 12 – Baseline) were determined by Kruskal-Wallis with Dunn's test and corrected by FDR. The centered log ratio transformed counts of taxa were used in the statistical models. \*  $q < 0.15$ . Data were reported as mean  $\pm$  SD.

**Table S3. Fecal bacterial relative abundance changes in female IL-10<sup>-/-</sup> mice with isomaltodextrin (IMD) intervention**

| Taxa                | Control   |            |                |                              |      | Low Dose IMD |            |                |                              |      | High Dose IMD |            |                |                              |      | Between Group Shift <i>p</i> values | FDR  |
|---------------------|-----------|------------|----------------|------------------------------|------|--------------|------------|----------------|------------------------------|------|---------------|------------|----------------|------------------------------|------|-------------------------------------|------|
|                     | Baseline  | Week 12    | Absolute Shift | Within Group <i>p</i> values | FDR  | Baseline     | Week 12    | Absolute Shift | Within Group <i>p</i> values | FDR  | Baseline      | Week 12    | Absolute Shift | Within Group <i>p</i> values | FDR  |                                     |      |
| <b>Phylum</b>       |           |            |                |                              |      |              |            |                |                              |      |               |            |                |                              |      |                                     |      |
| F/B Ratio           | 0.63±0.2  | 0.59±0.5   | -0.04±0.6      | 0.56                         | 0.88 | 0.87±0.9     | 0.63±0.3   | -0.24±1        | 1.00                         | 1.00 | 0.52±0.4      | 0.49±0.2   | -0.03±0.5      | 1.00                         | 1.00 | 0.70                                | 0.88 |
| Bacteroidetes       | 61.01±6.9 | 59.62±12.7 | -1.4±18.7      | 1.00                         | 1.00 | 57.83±19     | 58.64±9.2  | 0.81±23.2      | 0.69                         | 1.00 | 68.45±18.7    | 57.64±12.3 | -10.8±29.2     | 0.56                         | 1.00 | 0.83                                | 0.88 |
| Firmicutes          | 37.29±6.3 | 30.86±17.1 | -6.4±21.8      | 0.56                         | 0.88 | 36.89±21.2   | 35.17±11.4 | -1.7±25.4      | 1.00                         | 1.00 | 29.36±17.7    | 27.93±10.1 | -1.43±20.7     | 0.69                         | 1.00 | 0.75                                | 0.88 |
| Verrucomicrobia     | 0±0       | 3.05±7.5   | 3.05±7.5       | 1.00                         | 1.00 | 2.78±6.8     | 3.07±7.5   | 0.29±11.1      | 0.79                         | 1.00 | 0±0           | 11.17±17.6 | 11.17±17.6     | 0.37                         | 0.83 | 0.67                                | 0.88 |
| Proteobacteria      | 1.03±0.9  | 1.71±1     | 0.68±1.3       | 0.56                         | 0.88 | 1.93±1.7     | 1.63±1.4   | -0.3±1.9       | 1.00                         | 1.00 | 0.78±0.6      | 2.14±0.8   | 1.37±1.2       | 0.03                         | 0.14 | 0.22                                | 0.87 |
| Tenericutes         | 0.45±0.5  | 0.46±0.5   | 0.01±0.5       | 1.00                         | 1.00 | 0.27±0.4     | 0.43±0.4   | 0.17±0.5       | 0.56                         | 1.00 | 1±1.7         | 0.52±0.5   | -0.48±2        | 1.00                         | 1.00 | 0.88                                | 0.88 |
| Cyanobacteria       | 0±0       | 3.93±8.2   | 3.93±8.2       | 0.37                         | 0.88 | 0±0          | 0.62±0.7   | 0.62±0.7       | 0.10                         | 0.90 | 0.14±0.3      | 0.25±0.6   | 0.12±0.3       | 1.00                         | 1.00 | 0.33                                | 0.87 |
| Actinobacteria      | 0.13±0.1  | 0.26±0.2   | 0.13±0.1       | 0.06                         | 0.56 | 0.19±0.2     | 0.27±0.3   | 0.09±0.4       | 0.84                         | 1.00 | 0.09±0.1      | 0.31±0.3   | 0.21±0.3       | 0.18                         | 0.53 | 0.78                                | 0.88 |
| TM7                 | 0.1±0.2   | 0.1±0.1    | 0.01±0.1       | 0.58                         | 0.88 | 0.12±0.1     | 0.17±0.2   | 0.05±0.2       | 0.59                         | 1.00 | 0.18±0.2      | 0.04±0.1   | -0.15±0.1      | 0.03                         | 0.14 | 0.13                                | 0.87 |
| <b>Genus</b>        |           |            |                |                              |      |              |            |                |                              |      |               |            |                |                              |      |                                     |      |
| f S24-7             | 43.87±5.5 | 34.76±8.8  | -9.1±13.4      | 0.16                         | 0.36 | 40±15.7      | 35.32±9.6  | -4.6±19.4      | 0.22                         | 0.70 | 43.97±11.9    | 31.39±12.6 | -12.57±20      | 0.56                         | 0.79 | 0.35                                | 0.66 |
| f Lachnospiraceae 1 | 19.59±6.7 | 19.3±10.9  | -0.3±17.3      | 0.31                         | 0.61 | 19.35±12.4   | 17.28±7.7  | -2.1±16.5      | 0.56                         | 1.00 | 16.07±9.5     | 15.29±6    | -0.77±11.3     | 0.84                         | 0.95 | 0.35                                | 0.66 |
| g [Prevotella]      | 4.89±3.3  | 10.05±6.3  | 5.16±6.1       | 0.56                         | 0.86 | 4.14±2.4     | 5.51±4     | 1.36±4.5       | 1.00                         | 1.00 | 12.97±10.8    | 6.24±4.3   | -6.73±13.4     | 0.56                         | 0.79 | 0.02                                | 0.38 |
| o Clostridiales 1   | 5.26±2.5  | 2.52±2.3   | -2.74±4        | 0.03                         | 0.24 | 5.22±3.4     | 7.77±3.4   | 2.55±4.9       | 0.69                         | 1.00 | 4.06±3.7      | 6.85±3.3   | 2.79±5.3       | 0.22                         | 0.64 | 0.78                                | 0.83 |
| g Prevotella        | 2.89±2    | 5.46±4.2   | 2.56±3.4       | 0.69                         | 0.86 | 4.93±5.7     | 8.19±2.6   | 3.26±6         | 0.31                         | 0.78 | 3.2±3.7       | 4.28±3.3   | 1.07±6.9       | 0.56                         | 0.79 | 0.55                                | 0.77 |
| f Rikenellaceae     | 4.68±2.4  | 3.67±1.4   | -1.01±3.2      | 0.44                         | 0.73 | 4.26±1.8     | 5.22±2.9   | 0.96±4.2       | 0.84                         | 1.00 | 4.21±2.4      | 8.25±11.8  | 4.04±11.6      | 1.00                         | 1.00 | 0.17                                | 0.45 |
| g Bacteroides       | 1.4±0.8   | 2.55±0.9   | 1.15±1.2       | 0.31                         | 0.61 | 1.8±1.3      | 3.03±2.5   | 1.23±2.9       | 0.84                         | 1.00 | 1.68±1.2      | 5.41±4.2   | 3.73±3.6       | 0.06                         | 0.47 | 0.10                                | 0.41 |
| g Oscillospira      | 2.82±1.4  | 1.24±0.9   | -1.58±2.2      | 0.06                         | 0.24 | 2.9±2.3      | 2.04±0.5   | -0.87±2.6      | 0.69                         | 1.00 | 1.85±2.3      | 1.38±0.8   | -0.48±2.7      | 0.69                         | 0.86 | 0.52                                | 0.77 |
| g Akkermansia       | 0±0       | 3.05±7.5   | 3.05±7.5       | 0.69                         | 0.86 | 2.78±6.8     | 3.07±7.5   | 0.29±11.1      | 0.84                         | 1.00 | 0±0           | 11.17±17.6 | 11.17±17.6     | 0.31                         | 0.64 | 0.12                                | 0.41 |
| f Lachnospiraceae 2 | 2.66±0.6  | 1.45±1.2   | -1.22±0.9      | 0.03                         | 0.24 | 2.53±2       | 1.71±0.5   | -0.82±1.7      | 0.44                         | 0.96 | 1.93±1.5      | 0.77±0.6   | -1.16±1.3      | 0.09                         | 0.47 | 0.98                                | 0.98 |
| g Lactobacillus     | 2.66±3.1  | 3.06±5.3   | 0.4±7          | 0.69                         | 0.86 | 1.21±1.3     | 1.92±2.5   | 0.71±2.4       | 1.00                         | 1.00 | 1.08±1.6      | 1.06±1.2   | -0.02±2.2      | 0.69                         | 0.86 | 0.12                                | 0.41 |
| o Clostridiales 2   | 1.4±1.1   | 1±1.5      | -0.4±2         | 0.06                         | 0.24 | 1.92±1.4     | 2.12±1.7   | 0.2±2.4        | 0.84                         | 1.00 | 1.84±1.4      | 0.52±0.4   | -1.33±1.7      | 0.06                         | 0.47 | 0.59                                | 0.77 |
| g AF12              | 3.24±1.9  | 1.58±0.9   | -1.66±2        | 0.09                         | 0.27 | 2.15±1.3     | 0.93±0.5   | -1.22±1.2      | 0.22                         | 0.70 | 1.61±1.3      | 1.59±2.9   | -0.03±3.9      | 0.56                         | 0.79 | 0.09                                | 0.41 |
| g [Ruminococcus]    | 1.59±0.6  | 0.87±0.6   | -0.72±0.9      | 0.06                         | 0.24 | 1.93±1.2     | 0.68±0.5   | -1.26±1.1      | 0.03                         | 0.27 | 1.1±0.5       | 0.19±0.3   | -0.91±0.6      | 0.03                         | 0.47 | 0.07                                | 0.41 |
| g Sutterella        | 0.2±0.2   | 1.29±0.9   | 1.09±0.9       | 0.06                         | 0.24 | 0.75±1.2     | 1.02±1.2   | 0.27±1.6       | 0.84                         | 1.00 | 0.29±0.4      | 1.2±0.8    | 0.91±0.9       | 0.09                         | 0.47 | 0.41                                | 0.70 |
| g Anaeroplasma      | 0.45±0.5  | 0.46±0.5   | 0.01±0.5       | 0.56                         | 0.86 | 0.27±0.4     | 0.43±0.4   | 0.17±0.5       | 0.69                         | 1.00 | 1±1.7         | 0.52±0.5   | -0.48±2        | 1.00                         | 1.00 | 0.12                                | 0.41 |
| g Dehalobacterium   | 0.41±0.1  | 0.31±0.2   | -0.1±0.2       | 0.03                         | 0.24 | 0.43±0.5     | 0.7±0.2    | 0.27±0.5       | 0.22                         | 0.70 | 0.33±0.2      | 0.45±0.2   | 0.12±0.3       | 0.31                         | 0.64 | 0.37                                | 0.67 |
| o YS2 unclass       | 0±0       | 3.93±8.2   | 3.93±8.2       | 1.00                         | 1.00 | 0±0          | 0.62±0.7   | 0.62±0.7       | 0.16                         | 0.68 | 0.14±0.3      | 0.25±0.6   | 0.12±0.3       | 0.69                         | 0.86 | 0.26                                | 0.59 |
| g Clostridium       | 0.21±0.3  | 0.11±0.2   | -0.09±0.3      | 0.44                         | 0.73 | 0.41±0.5     | 0.16±0.3   | -0.25±0.3      | 0.03                         | 0.27 | 0.26±0.5      | 0.25±0.4   | -0.02±0.5      | 1.00                         | 1.00 | 0.24                                | 0.57 |
| g Desulfovibrio     | 0.5±0.4   | 0.19±0.2   | -0.31±0.5      | 0.09                         | 0.27 | 0.54±0.5     | 0.27±0.3   | -0.27±0.6      | 0.31                         | 0.78 | 0.17±0.2      | 0.37±0.6   | 0.21±0.7       | 0.56                         | 0.79 | 0.14                                | 0.44 |
| f Ruminococcaceae 1 | 0.19±0.3  | 0.35±0.4   | 0.16±0.4       | 0.69                         | 0.86 | 0.32±0.2     | 0.23±0.3   | -0.09±0.3      | 0.16                         | 0.68 | 0.2±0.2       | 0.13±0.3   | -0.07±0.3      | 0.16                         | 0.64 | 0.16                                | 0.45 |
| g Bilophila         | 0.33±0.4  | 0.08±0.1   | -0.26±0.4      | 0.09                         | 0.27 | 0.41±0.3     | 0.18±0.1   | -0.24±0.4      | 0.31                         | 0.78 | 0.2±0.2       | 0.41±0.5   | 0.21±0.6       | 0.56                         | 0.79 | 0.02                                | 0.38 |
| o Bacteroidales     | 0.03±0.1  | 1.49±2.7   | 1.46±2.7       | 0.06                         | 0.24 | 0.2±0.2      | 0.09±0.1   | -0.11±0.3      | 0.69                         | 1.00 | 0.71±0.9      | 0.17±0.3   | -0.54±1.1      | 0.22                         | 0.64 | 0.95                                | 0.98 |

|                      |          |          |           |      |      |          |          |           |      |      |          |          |           |      |      |      |      |
|----------------------|----------|----------|-----------|------|------|----------|----------|-----------|------|------|----------|----------|-----------|------|------|------|------|
| g Adlercreutzia      | 0.13±0.1 | 0.26±0.2 | 0.13±0.1  | 0.16 | 0.36 | 0.19±0.2 | 0.27±0.3 | 0.09±0.4  | 1.00 | 1.00 | 0.09±0.1 | 0.31±0.3 | 0.21±0.3  | 0.56 | 0.79 | 0.46 | 0.73 |
| g Parabacteroides    | 0±0      | 0.07±0.2 | 0.07±0.2  | 1.00 | 1.00 | 0.34±0.8 | 0.36±0.4 | 0.01±1    | 0.44 | 0.96 | 0.1±0.2  | 0.32±0.3 | 0.22±0.2  | 0.22 | 0.64 | 0.74 | 0.81 |
| g Anaerotruncus      | 0.1±0.2  | 0.21±0.2 | 0.11±0.3  | 0.44 | 0.73 | 0.17±0.2 | 0.25±0.2 | 0.08±0.3  | 1.00 | 1.00 | 0.04±0.1 | 0.22±0.4 | 0.17±0.4  | 0.31 | 0.64 | 0.08 | 0.41 |
| g Coprococcus        | 0.32±0.2 | 0.06±0.1 | -0.26±0.1 | 0.03 | 0.24 | 0.27±0.2 | 0.14±0.2 | -0.13±0.1 | 0.03 | 0.27 | 0.26±0.2 | 0.1±0.1  | -0.17±0.2 | 0.09 | 0.47 | 0.06 | 0.41 |
| f F16                | 0.1±0.2  | 0.1±0.1  | 0.01±0.1  | 1.00 | 1.00 | 0.12±0.1 | 0.17±0.2 | 0.05±0.2  | 1.00 | 1.00 | 0.18±0.2 | 0.04±0.1 | -0.15±0.1 | 0.03 | 0.47 | 0.65 | 0.81 |
| f Enterobacteriaceae | 0±0      | 0.01±0   | 0.01±0    | 0.84 | 0.98 | 0±0      | 0±0      | 0±0       | 0.09 | 0.55 | 0±0      | 0±0      | 0±0       | 0.84 | 0.95 | 0.69 | 0.81 |
| g Ruminococcus       | 0.06±0.1 | 0.11±0.1 | 0.04±0.2  | 0.84 | 0.98 | 0.08±0.1 | 0.04±0.1 | -0.03±0.2 | 0.84 | 1.00 | 0.06±0.1 | 0.18±0.4 | 0.12±0.4  | 1.00 | 1.00 | 0.69 | 0.81 |
| o RF32 unclass       | 0±0      | 0.15±0.2 | 0.15±0.2  | 0.16 | 0.36 | 0.22±0.5 | 0.16±0.3 | -0.07±0.7 | 1.00 | 1.00 | 0.12±0.2 | 0.16±0.2 | 0.04±0.2  | 0.31 | 0.64 | 0.57 | 0.77 |
| g Turicibacter       | 0±0      | 0.17±0.4 | 0.17±0.4  | 1.00 | 1.00 | 0±0      | 0.04±0.1 | 0.04±0.1  | 0.69 | 1.00 | 0±0      | 0.52±1   | 0.52±1    | 0.31 | 0.64 | 0.74 | 0.81 |
| g Butyricicoccus     | 0±0      | 0.03±0.1 | 0.03±0.1  | 0.69 | 0.86 | 0.08±0.2 | 0±0      | -0.08±0.2 | 0.03 | 0.27 | 0.18±0.3 | 0.02±0   | -0.16±0.4 | 0.44 | 0.79 | 0.31 | 0.66 |
| f Ruminococcaceae 2  | 0±0      | 0.07±0.2 | 0.07±0.2  | 1.00 | 1.00 | 0.06±0.1 | 0.09±0.1 | 0.03±0.1  | 1.00 | 1.00 | 0.08±0.1 | 0.01±0   | -0.07±0.1 | 0.22 | 0.64 | 0.47 | 0.73 |
| g Allobaculum        | 0±0      | 0±0      | 0±0       | 0.31 | 0.61 | 0±0      | 0±0      | 0±0       | 0.09 | 0.55 | 0±0      | 0±0      | 0±0       | 0.84 | 0.95 | 0.35 | 0.66 |

While majority of ASVs were classified at the genus level, some could only be classified to family (f\_), order (o\_), or class (c\_) levels. Statistical significance of within-group shifts between times was determined by paired Wilcoxon test, while between-group differences in shift ( $\Delta$  Week 12 – Baseline) were determined by Kruskal-Wallis with Dunn's test and corrected by FDR. The centered log ratio transformed counts of taxa were used in the statistical models. \*  $q < 0.15$ . Data were reported as mean  $\pm$  SD.



**Table S1. Histology scoring assessment in male and female IL-10<sup>-/-</sup> mice with isomaltodextrin (IMD) for 12 weeks**

|                               | Male      |           |           |          | Female    |           |           |          |
|-------------------------------|-----------|-----------|-----------|----------|-----------|-----------|-----------|----------|
|                               | Control   | LD        | HD        | <i>p</i> | Control   | LD        | HD        | <i>p</i> |
| Histology score               | 2.50±2.35 | 2.00±2.53 | 2.50±2.26 | 0.88     | 2.00±1.90 | 2.00±2.76 | 3.50±1.64 | 0.43     |
| Neutrophil infiltration score | 1.00±0.89 | 0.67±1.03 | 0.83±0.98 | 0.74     | 1.00±0.89 | 0.67±0.82 | 1.33±0.82 | 0.35     |
| Lymphocyte infiltration score | 1.17±0.98 | 0.83±0.98 | 1.33±1.03 | 0.47     | 0.83±0.75 | 0.83±0.98 | 1.67±0.82 | 0.90     |
| Tissue injury score           | 0.33±0.82 | 0.50±0.84 | 0.33±0.52 | 0.94     | 0.17±0.41 | 0.50±1.22 | 0.50±0.55 | 0.45     |

Statistical comparisons between-groups were by ANCOVA with permutations (n=999), adjusted by the food consumption AUC. Post hoc multiple comparison used Tukey's test. Data were reported as mean ± SD.
